# Supplementary material for: Selective cleavage of ester linkages of anhydride-cured epoxy using a benign method and reuse of the decomposed polymer in new epoxy preparation
Source: Royal Society of Chemistry journal article supplement (doi:10.1039/c7gc01737e), 2017-01-01
Supplement: c7gc01737e2.pdf [file c7gc01737e2.pdf]

## Supporting information

### Selective cleavage of ester linkages of anhydride-cured epoxy using a benign method and reuse of the decomposed polymer in new epoxy preparation

Tuan Liu,<sup>a</sup> Xiaolong Guo,<sup>a</sup> Wangcheng Liu,<sup>a</sup> Cheng Hao,<sup>a</sup> Liwei Wang,<sup>a</sup> William C. Hiscox,<sup>b</sup>  
Chengyun Liu,<sup>a</sup> Can Jin,<sup>a,c</sup> Junna Xin,<sup>a</sup> and Jinwen Zhang<sup>a\*</sup>

**Table S1.** The solubility of the decomposed polymer (DMP)

| Solvent    | Water  | Ethanol    | Acetone         | Methanol    | Tetrahydrofuran |
|------------|--------|------------|-----------------|-------------|-----------------|
| Solubility | -      | ±          | +               | ±           | +               |
| Solvent    | Hexane | Chloroform | Dichloromethane | Ethyl ether | Ethyl acetate   |
| Solubility | -      | -          | -               | -           | +               |

-: insoluble; +: soluble; ±: partially soluble

The DMP was obtained from the reaction conditions of 190 °C, 0.2 g HPW in 19.8 g water, 6 g cured epoxy, 5 h.

**Table S2.** Water absorption of anhydride-cured epoxy in different temperatures

|                       | 130 °C | 150 °C | 170 °C | 190 °C           |
|-----------------------|--------|--------|--------|------------------|
| Weight increase (wt%) | 1.7    | 1.8    | 5.3    | 5.6 <sup>a</sup> |

<sup>a</sup> Because the sample was slightly decomposed at 190 °C, the data may not accurate.

Water cannot effectively permeate into the cross-linked network below the  $T_g$  of sample. That is because epoxies usually possess high crosslink density and stable chemical structures which render excellent barrier properties to water. Only when the reaction temperature reaches to the  $T_g$ , the chain segments will have adequate mobility to allow the water/catalyst system to effectively permeate into the sample and cleave some of the chemical bonds of the polymer.

**Table S3.** Formulations of the new epoxy curing systems.

| Samples    | DER 331 epoxy |             | NMA curing agent |                 | DMP      |                |                |
|------------|---------------|-------------|------------------|-----------------|----------|----------------|----------------|
|            | Mass (g)      | Epoxy (mol) | Mass (g)         | Anhydride (mol) | Mass (g) | Hydroxyl (mol) | Carboxyl (mol) |
| Neat       | 100           | 0.53        | 75.8             | 0.43            | 0        | 0              | 0              |
| 5 wt% DMP  | 95            | 0.5         | 75.8             | 0.43            | 5        | 0.11           | 0.02           |
| 10 wt% DMP | 90            | 0.48        | 75.8             | 0.43            | 10       | 0.23           | 0.03           |
| 20 wt% DMP | 80            | 0.42        | 75.8             | 0.43            | 20       | 0.45           | 0.07           |
| 30 wt% DMP | 70            | 0.37        | 75.8             | 0.43            | 30       | 0.68           | 0.10           |
| 40 wt% DMP | 60            | 0.32        | 75.8             | 0.43            | 40       | 0.90           | 0.13           |
| 50 wt% DMP | 50            | 0.27        | 75.8             | 0.43            | 50       | 1.13           | 0.17           |

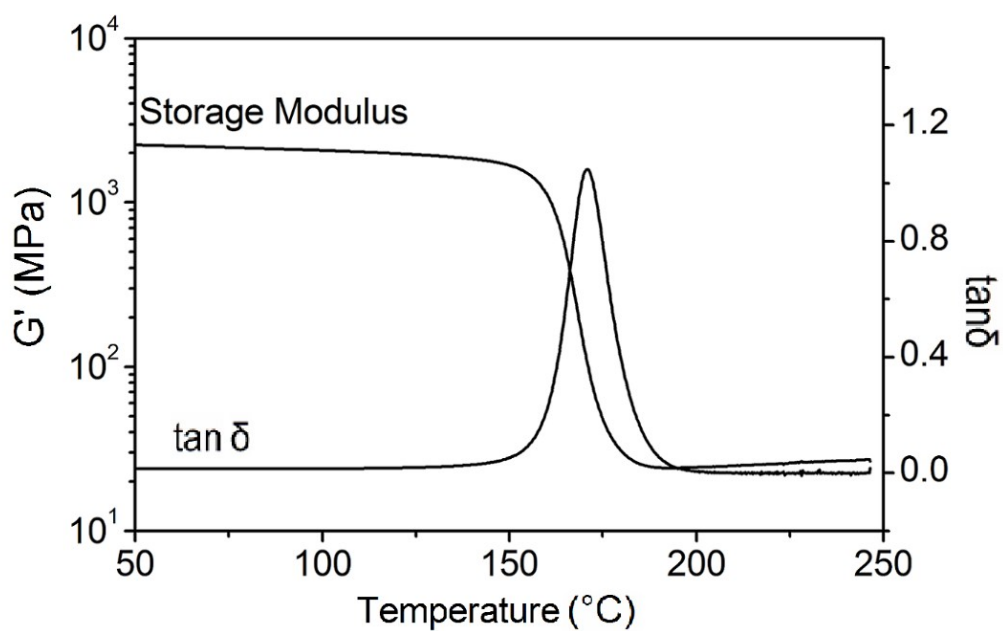

**Fig. S1** DMA curves of anhydride-cured epoxy before degradation.

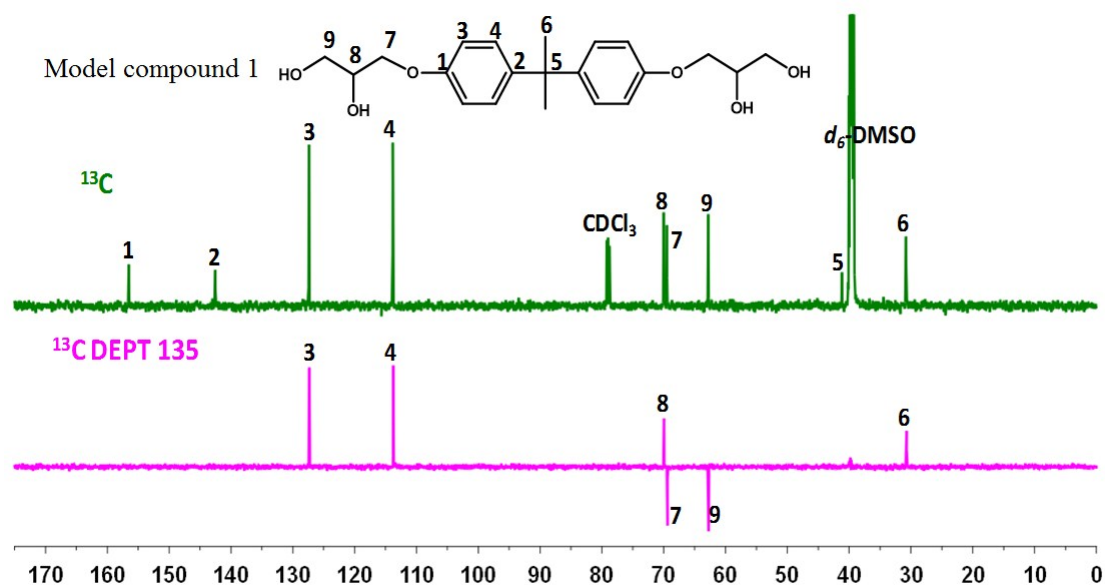

**Fig. S2**  $^{13}\text{C}$ -NMR spectra of model compound 1.

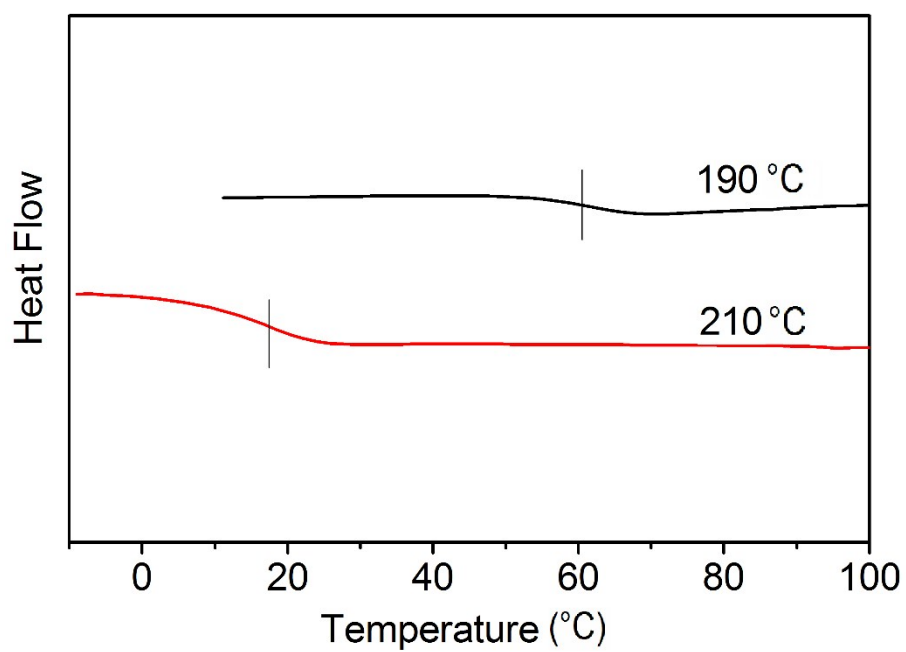

**Fig. S3** DSC curves of DMP from different reaction temperature.

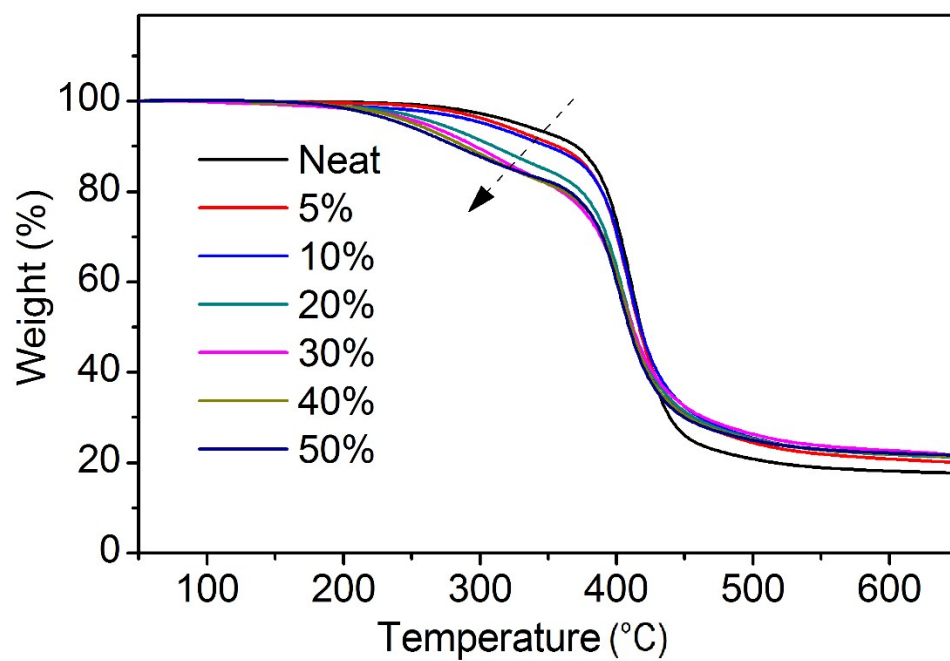

**Fig. S4** TGA curves of the new epoxy materials with different DMP loading contents.

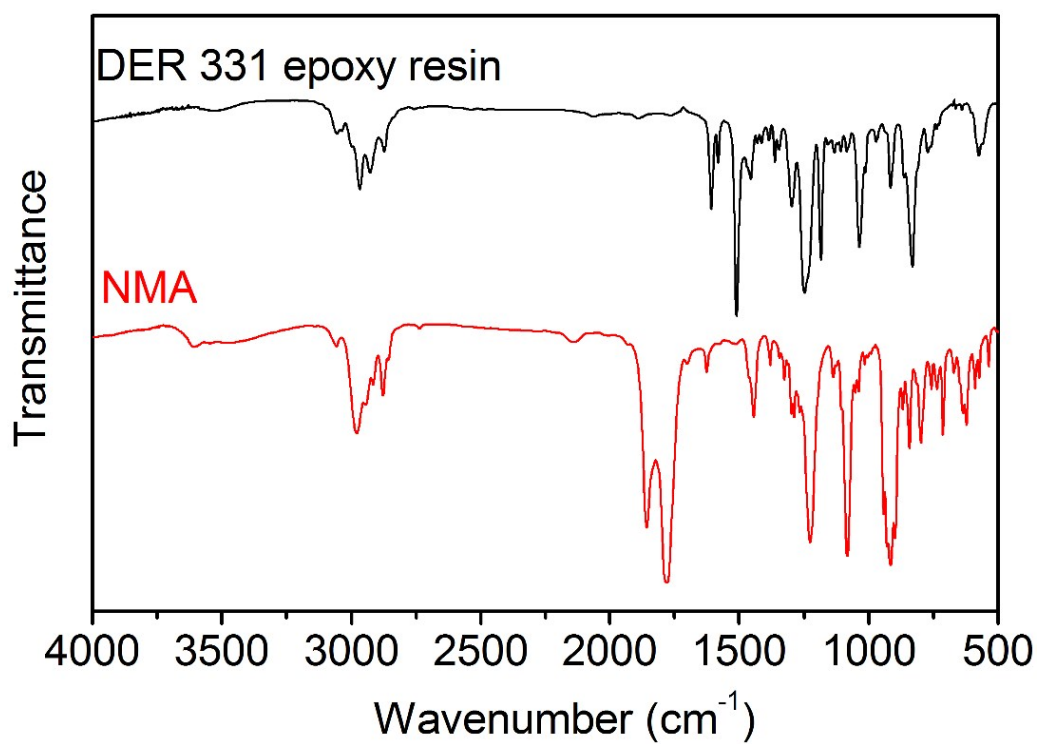

**Fig. S5** FTIR spectra of DER 331 and NMA.

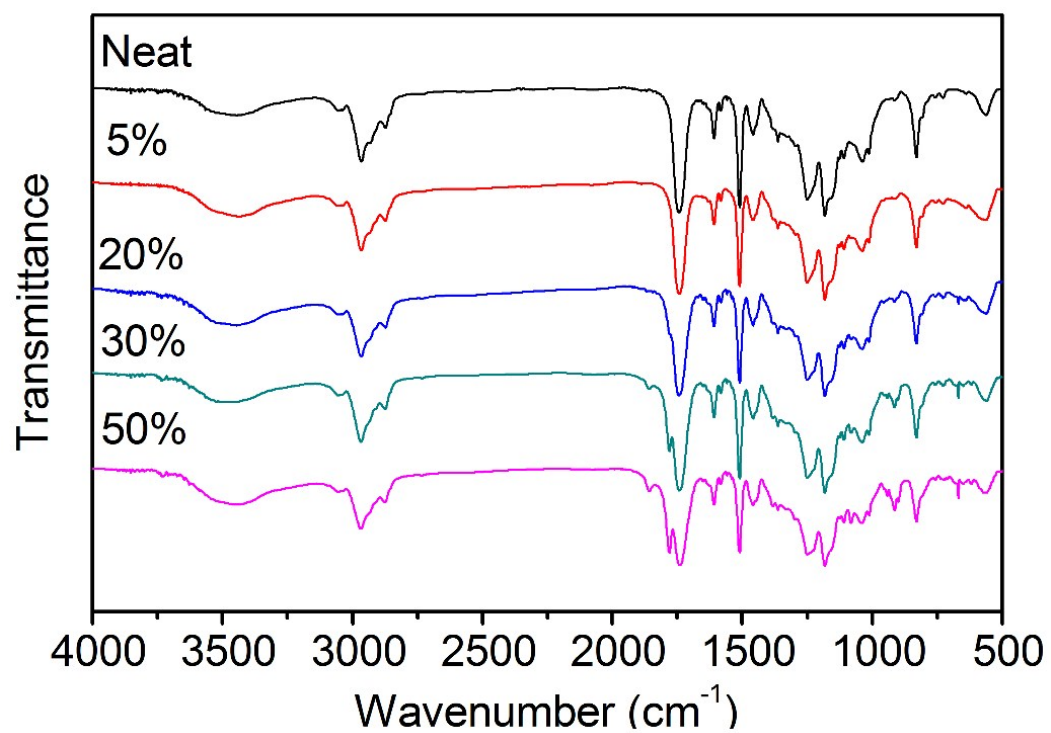

**Fig. S6** FTIR spectra of anhydride-cured epoxy with different DMP contents.
